# Supplementary material for: Toxic metal–organic gels using a unique pyridine–pyrazole based ligand with Pb(ii), Cd(ii) and Hg(ii) salts: multi-stimuli responsiveness and toxic dye adsorption
Source: Royal Society of Chemistry journal article supplement (doi:10.1039/d2ma00483f), 2022-01-01
Supplement: d2ma00483f1.pdf [file d2ma00483f1.pdf]

## **Supporting information**

### **Toxic Metal-Organic Gels Using a Unique Pyridine-Pyrazole Based Ligand with Pb(II), Cd(II) and Hg(II) Salts: Multi-stimuli Responsiveness and Toxic Dye Adsorption**

Manasi Roy\*, Amit Adhikary, Sayan Saha, Raju mondal\*

- **Procedure for the synthesis of ligand H<sub>3</sub>BPDP: Scheme 1**
- **Thermogravimetric analysis of MOGs 1-3: Figure S1**
- **Simulated and experimental powder XRD patterns of MOGs 1-3: Figure S2**
- **Comparison of PXRD pattern before & after dye adsorption of MOG1 and MOG2 : Figure S3**
- **Simulated and experimental powder XRD patterns of MOF 1: Figure S4**
- **Effect of pH on MOG 1: Figure S5**
- **Crystallographic data and refinement parameters for MOF 1: Table S1**
- **Selected Bond Angles and Bond Lengths of MOF 1: Table S2**

## Synthesis of ligand:

1, 3 diacetyl benzene (660 mg) and pyridine pyrazole carbohydrazide (2070 mg) was taken in EtOH solution and catalytic amount of galcial acetic acetic acid was added to it, then the mixture was allowed to reflux at 80°C, for 168 hr. After 168 hr white colour precipitate was obtained then cooled it to room temperture. Then the precipitate was filtered, washed with EtOH solvent and dried in air. Yield 85% was obtained as a schiff base.

**Elemental Analysis for Ligand (C<sub>28</sub>H<sub>24</sub>N<sub>10</sub>O<sub>2</sub>): Calculated:** C, 63.09; H, 4.50; N, 26.20

**Found:** C, 63.59; H, 4.98; N, 27.39.

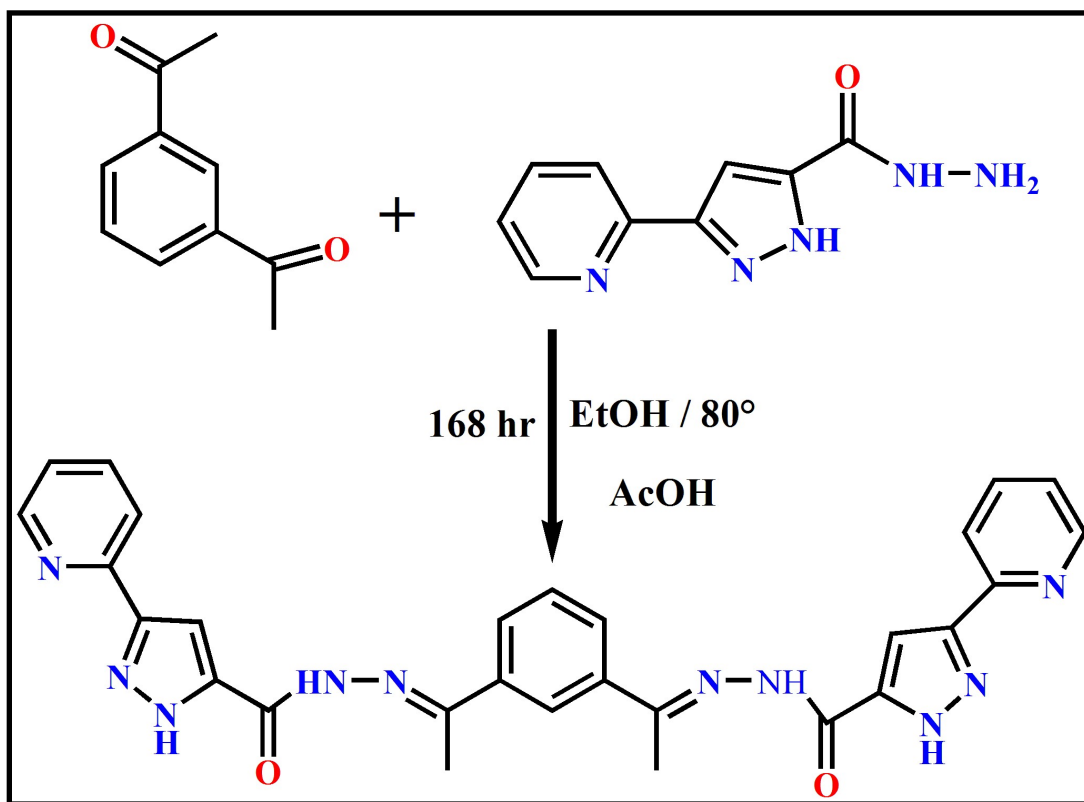

**Scheme S1** Schematic representation of synthesis of ligand

## Thermo gravimetric Analysis:

To check the thermal stability we performed the TGA analysis. The experiment was carried out on xerogel samples of corresponding gel under  $N_2$  atmosphere with a heating rate of  $10^\circ C/min$  in a platinum crucible. For Pb xerogel very small weight loss was observed initially and it shows thermal stability upto  $300^\circ C$  and the steadily decreases with consequent weight loss upto 69%. Hg xerogel shows a gradual weight loss and stable upto  $170^\circ C$  and then slowly complete dissociation is observed. Cd xerogel dissociates with small weight loss at  $40^\circ C - 120^\circ C$ . This initial weight loss may be attributed to the loss of solvent molecules and lastly complete dissociation is observed at higher temperature.

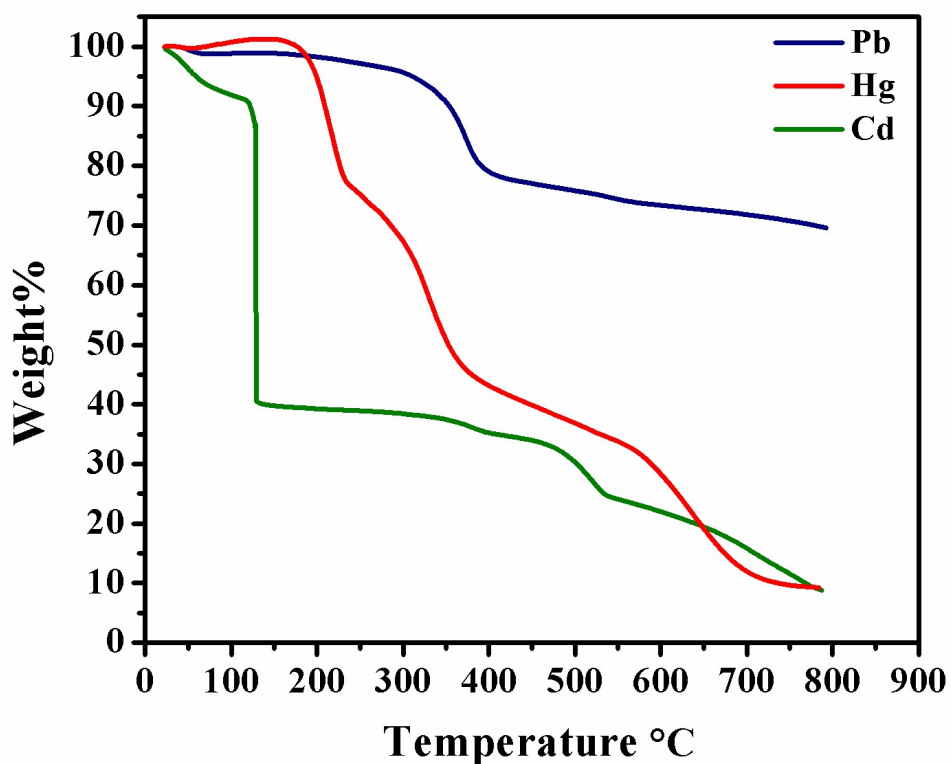

Figure S1 Thermogravimetric analysis of MOG 1-3

## PXRD analysis:

X-ray diffraction analysis has also been carried out for ligand and all the MOGs (in their gel state). X-ray diffraction pattern of free ligand shows crystalline nature. However, despite our best efforts, we were unable to get the suitable single crystal of ligand. Among all the MOGs only Pb xerogel shows crystalline nature. Crystallinity was also confirmed by nano particle formation observed in TEM images. Whereas powder X-ray diffraction patterns of MOG2 and MOG3 confirms the amorphous nature. Crystalline nature of Pb MOG prompted us to get a single crystal in different solvent medium and to our best efforts we were able to synthesize MOF 1. Experimental powder X-ray pattern of MOF 1 is well matched with the simulated one (Figure S3).

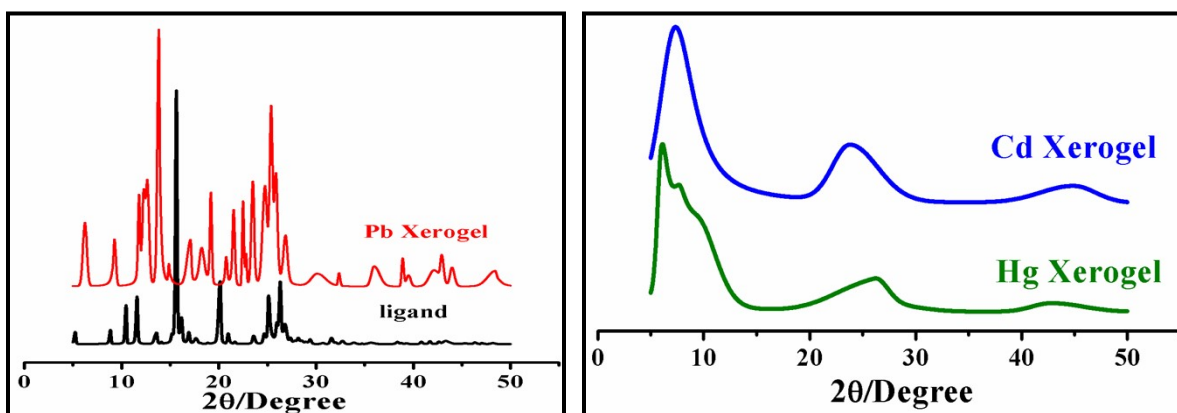

Figure S2 Powder X-ray pattern of ligand, MOG1, MOG 2, and MOG3 xerogels.

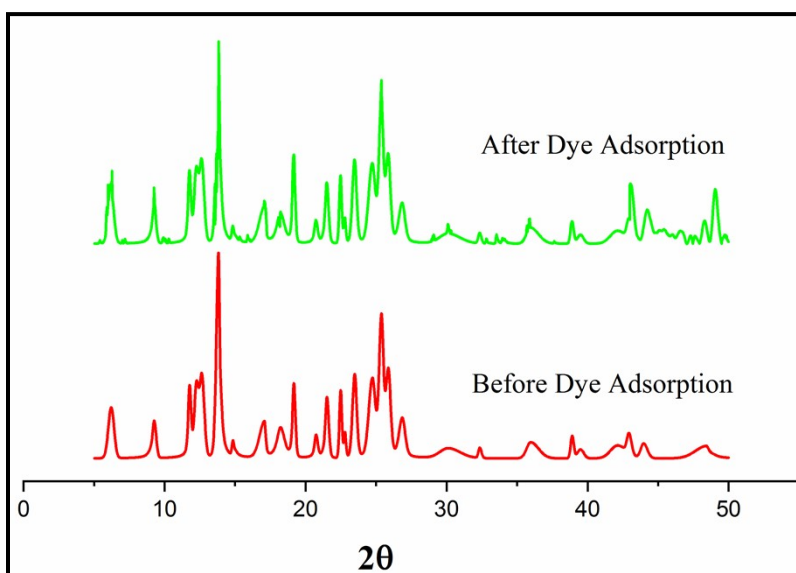

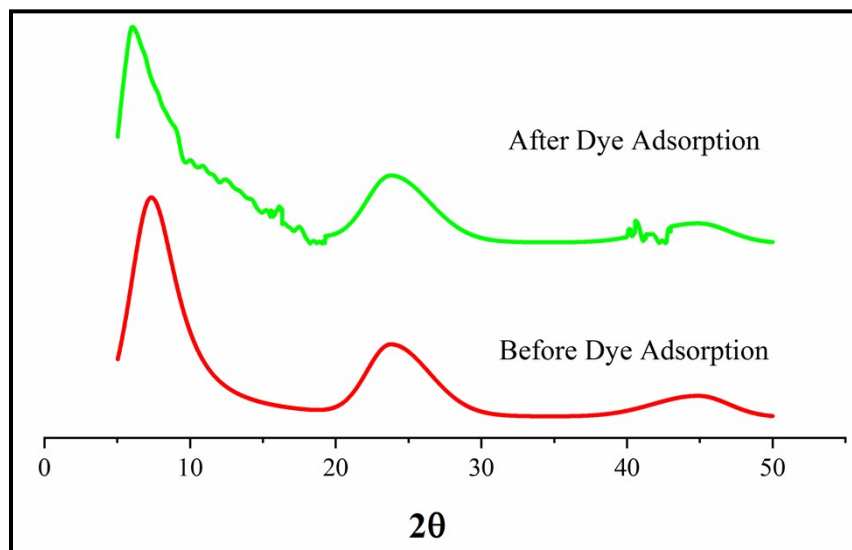

**Figure S3** Comparison of PXRD pattern before & after dye adsorption of MOG1 and MOG2

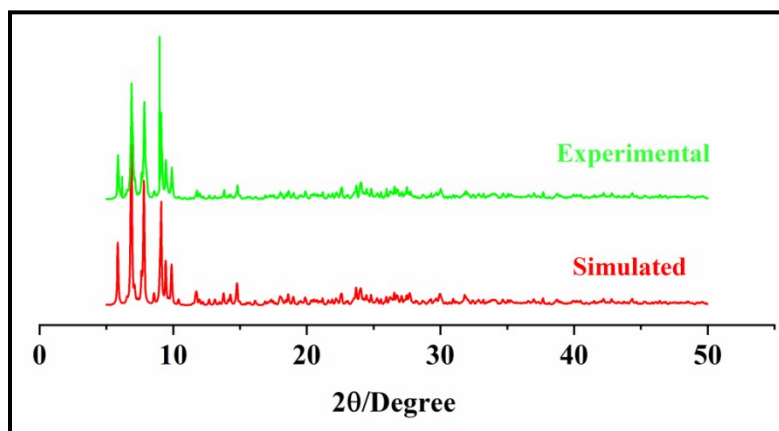

**Figure S4** Simulated and experimental powder XRD patterns of MOF 1

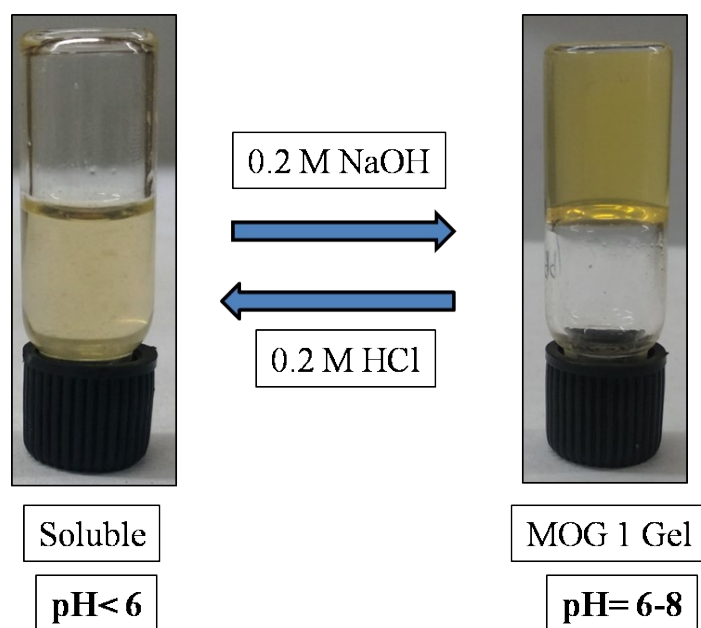

**Figure S5** Effect of pH on MOG 1

**Table S1: Crystallographic data file**

|                          |                                |                              |           |
|--------------------------|--------------------------------|------------------------------|-----------|
| <b>Compound</b>          | <b>MOF 1</b>                   | $\gamma/^\circ$              | 86.948(4) |
| <b>Empirical formula</b> | $C_{59}H_{48}N_{25}O_{17}Pb_5$ | $V/\text{\AA}^3$             | 4690.2(8) |
| <b>Crystal system</b>    | Triclinic                      | <b>Reflections collected</b> | 12869     |
| <b>Formula weight</b>    | 1125.88                        | <b>unique reflections</b>    | 12869     |
| <b>Space group</b>       | P 2 <sub>1</sub> /n            | <b>observed reflections</b>  | 7712      |
| $a/\text{\AA}$           | 13.5047(14)                    | <b>R1</b>                    | 0.1246    |
| $b/\text{\AA}$           | 15.0579(16)                    | <b>wR2</b>                   | 0.3421    |
| $c/\text{\AA}$           | 23.174(2)                      | <b>CCDC no.</b>              | 2058105   |
| $\alpha/^\circ$          | 87.553(4)                      |                              |           |
| $\beta/^\circ$           | 85.906(4)                      |                              |           |

**Table S2: Selected bond lengths and angles of MOF 1**

| <b>MOF 1</b>                                         |                 |                                        |                  |
|------------------------------------------------------|-----------------|----------------------------------------|------------------|
| <b>N<sub>72</sub> Pb<sub>1</sub> N<sub>29</sub></b>  | <b>87.9(8)</b>  | <b>Pb<sub>1</sub> -N<sub>72</sub></b>  | <b>2.31(3)</b>   |
| <b>N<sub>72</sub> Pb<sub>1</sub> O<sub>31</sub></b>  | <b>68.1(8)</b>  | <b>Pb<sub>1</sub> -N<sub>29</sub></b>  | <b>2.44(2)</b>   |
| <b>N<sub>29</sub> Pb<sub>1</sub> O<sub>31</sub></b>  | <b>70.9(6)</b>  | <b>Pb<sub>1</sub> -O<sub>31</sub></b>  | <b>2.489(16)</b> |
| <b>N<sub>72</sub> Pb<sub>1</sub> O<sub>7B</sub></b>  | <b>78.6(8)</b>  | <b>Pb<sub>1</sub> -O<sub>7B</sub></b>  | <b>2.63(3)</b>   |
| <b>N<sub>29</sub> Pb<sub>1</sub> O<sub>7B</sub></b>  | <b>143.4(7)</b> | <b>Pb<sub>1</sub> -O<sub>18</sub></b>  | <b>2.737(17)</b> |
| <b>O<sub>31</sub> Pb<sub>1</sub> O<sub>7B</sub></b>  | <b>72.5(7)</b>  | <b>Pb<sub>2</sub> -N<sub>81</sub></b>  | <b>2.36(2)</b>   |
| <b>N<sub>72</sub> Pb<sub>1</sub> O<sub>18</sub></b>  | <b>85.4(7)</b>  | <b>Pb<sub>2</sub> -N<sub>16</sub></b>  | <b>2.43(2)</b>   |
| <b>N<sub>29</sub> Pb<sub>1</sub> O<sub>18</sub></b>  | <b>62.0(6)</b>  | <b>Pb<sub>2</sub> -O<sub>11</sub></b>  | <b>2.528(18)</b> |
| <b>O<sub>31</sub> Pb<sub>1</sub> O<sub>18</sub></b>  | <b>126.3(6)</b> | <b>Pb<sub>2</sub> -O<sub>9B</sub></b>  | <b>2.713(18)</b> |
| <b>O<sub>7B</sub> Pb<sub>1</sub> O<sub>18</sub></b>  | <b>148.0(7)</b> | <b>Pb<sub>3</sub> -N<sub>50</sub></b>  | <b>2.47(3)</b>   |
| <b>N<sub>81</sub> Pb<sub>2</sub> N<sub>16</sub></b>  | <b>85.6(8)</b>  | <b>Pb<sub>3</sub> -N<sub>38</sub></b>  | <b>2.51(2)</b>   |
| <b>N<sub>81</sub> Pb<sub>2</sub> O<sub>11</sub></b>  | <b>67.3(6)</b>  | <b>Pb<sub>3</sub> -N<sub>41</sub></b>  | <b>2.52(3)</b>   |
| <b>N<sub>16</sub> Pb<sub>2</sub> O<sub>11</sub></b>  | <b>68.7(7)</b>  | <b>Pb<sub>3</sub> -N<sub>65</sub></b>  | <b>2.65(3)</b>   |
| <b>N<sub>81</sub> Pb<sub>2</sub> O<sub>9B</sub></b>  | <b>131.2(7)</b> | <b>Pb<sub>4</sub> -O<sub>31</sub></b>  | <b>2.38(2)</b>   |
| <b>N<sub>16</sub> Pb<sub>2</sub> O<sub>9B</sub></b>  | <b>82.9(7)</b>  | <b>Pb<sub>4</sub> -N<sub>34</sub></b>  | <b>2.44(2)</b>   |
| <b>O<sub>11</sub> Pb<sub>2</sub> O<sub>9B</sub></b>  | <b>64.3(6)</b>  | <b>Pb<sub>4</sub> -N<sub>44</sub></b>  | <b>2.55(3)</b>   |
| <b>N<sub>50</sub> Pb<sub>3</sub> N<sub>38</sub></b>  | <b>136.1(9)</b> | <b>Pb<sub>4</sub> -O<sub>1A1</sub></b> | <b>2.68(2)</b>   |
| <b>N<sub>50</sub> Pb<sub>3</sub> N<sub>41</sub></b>  | <b>81.0(8)</b>  | <b>Pb<sub>4</sub> -N<sub>54</sub></b>  | <b>2.73(2)</b>   |
| <b>N<sub>38</sub> Pb<sub>3</sub> N<sub>41</sub></b>  | <b>63.4(9)</b>  | <b>Pb<sub>5</sub> -N<sub>35</sub></b>  | <b>2.31(3)</b>   |
| <b>N<sub>50</sub> Pb<sub>3</sub> N<sub>65</sub></b>  | <b>64.0(8)</b>  | <b>Pb<sub>5</sub> -O<sub>11</sub></b>  | <b>2.482(17)</b> |
| <b>N<sub>38</sub> Pb<sub>3</sub> N<sub>65</sub></b>  | <b>81.0(9)</b>  | <b>Pb<sub>5</sub> -N<sub>67</sub></b>  | <b>2.49(3)</b>   |
| <b>N<sub>41</sub> Pb<sub>3</sub> N<sub>65</sub></b>  | <b>73.3(8)</b>  | <b>Pb<sub>5</sub> -N<sub>46</sub></b>  | <b>2.60(3)</b>   |
| <b>O<sub>31</sub> Pb<sub>4</sub> N<sub>34</sub></b>  | <b>70.5(8)</b>  | <b>Pb<sub>5</sub> -O<sub>9B</sub></b>  | <b>2.75(2)</b>   |
| <b>O<sub>31</sub> Pb<sub>4</sub> N<sub>44</sub></b>  | <b>64.6(7)</b>  |                                        |                  |
| <b>N<sub>34</sub> Pb<sub>4</sub> N<sub>44</sub></b>  | <b>96.0(8)</b>  |                                        |                  |
| <b>O<sub>31</sub> Pb<sub>4</sub> O<sub>1A1</sub></b> | <b>67.6(7)</b>  |                                        |                  |
| <b>N<sub>34</sub> Pb<sub>4</sub> O<sub>1A1</sub></b> | <b>77.6(6)</b>  |                                        |                  |
| <b>N<sub>44</sub> Pb<sub>4</sub> O<sub>1A1</sub></b> | <b>131.0(7)</b> |                                        |                  |
| <b>O<sub>31</sub> Pb<sub>4</sub> N<sub>54</sub></b>  | <b>123.4(7)</b> |                                        |                  |
| <b>N<sub>34</sub> Pb<sub>4</sub> N<sub>54</sub></b>  | <b>64.1(8)</b>  |                                        |                  |
| <b>N<sub>44</sub> Pb<sub>4</sub> N<sub>54</sub></b>  | <b>88.0(8)</b>  |                                        |                  |
| <b>O<sub>1A1</sub> Pb<sub>4</sub> N<sub>54</sub></b> | <b>128.5(6)</b> |                                        |                  |
| <b>N<sub>35</sub> Pb<sub>5</sub> O<sub>11</sub></b>  | <b>67.2(8)</b>  |                                        |                  |
| <b>N<sub>35</sub> Pb<sub>5</sub> N<sub>67</sub></b>  | <b>85.3(10)</b> |                                        |                  |
| <b>O<sub>11</sub> Pb<sub>5</sub> N<sub>67</sub></b>  | <b>62.6(7)</b>  |                                        |                  |
| <b>N<sub>35</sub> Pb<sub>5</sub> N<sub>46</sub></b>  | <b>66.3(8)</b>  |                                        |                  |
| <b>O<sub>11</sub> Pb<sub>5</sub> N<sub>46</sub></b>  | <b>122.0(6)</b> |                                        |                  |
| <b>N<sub>67</sub> Pb<sub>5</sub> N<sub>46</sub></b>  | <b>80.9(9)</b>  |                                        |                  |
| <b>N<sub>35</sub> Pb<sub>5</sub> O<sub>9B</sub></b>  | <b>83.4(7)</b>  |                                        |                  |
| <b>O<sub>11</sub> Pb<sub>5</sub> O<sub>9B</sub></b>  | <b>64.4(6)</b>  |                                        |                  |

|                                                     |                 |  |
|-----------------------------------------------------|-----------------|--|
| <b>N<sub>67</sub> Pb<sub>5</sub> O<sub>9B</sub></b> | <b>126.0(7)</b> |  |
| <b>N<sub>46</sub> Pb<sub>5</sub> O<sub>9B</sub></b> | <b>138.3(9)</b> |  |
